1 **Asgard ESCRT-IIIs assemble into helical filaments in the presence of**  
2 **DNA and remodel eukaryotic membranes**

3

4 Nataly Melnikov<sup>1,2</sup>, Dikla Nachmias<sup>1,2</sup>, Gal Halbi<sup>3</sup>, Alexander Upcher<sup>4</sup>, Ran Zalk<sup>4</sup>, Ann  
5 Bernheim-Groswasser<sup>3,4</sup>, Natalie Elia<sup>1,2</sup>

6

7 1 Department of Life Sciences, Ben-Gurion University of the Negev, Beer Sheva 84105,  
8 Israel

9 2 National Institute for Biotechnology in the Negev (NIBN), Ben-Gurion University of the  
10 Negev, Beer Sheva 84105, Israel

11 3 Department of Chemical Engineering, Ben-Gurion University of the Negev, Beer  
12 Sheva 84105, Israel

13 4 Ilse Katz Institute for Nanoscale Science and Technology, Ben Gurion University of  
14 the Negev, Beer Sheva 84105, Israel

15

16 \* Corresponding author:

17 Natalie Elia

18 Phone: 972-8-6428735

19 Email: [elianat@post.bgu.ac.il](mailto:elianat@post.bgu.ac.il)

20

21

22

23

24

25

26

27

28

29

30

31

32 ABSTRACT

33

34 The ESCRT machinery mediate membrane remodeling in numerous processes in cells  
35 including cell division and nuclear membrane reformation. The identification of ESCRT  
36 homologs in Asgard archaea, currently considered the closest ancestor of eukaryotes,  
37 suggests a role for ESCRTs in the membrane remodeling processes that occurred  
38 during eukaryogenesis. Yet, the function of these distant ESCRT homologs is mostly  
39 unresolved. Here we show that Asgard ESCRT-III proteins self-assemble into homo-  
40 and hetero- helical tubes, a hallmark of the eukaryotic ESCRT system. Asgard ESCRT-  
41 III tube assembly was facilitated in the presence of DNA and inhibited by DNAase.  
42 Notably, Asgard ESCRT-III filaments remodeled eukaryotic-like membrane vesicles,  
43 also in the presence of DNA, indicating an ancient role for the ESCRT complex in  
44 membrane remodeling, that may involve DNA binding. The ability of Asgard archaeal  
45 ESCRTs to remodel eukaryotic-like membranes, places them at the junction between  
46 prokaryotes and eukaryotes, substantiating a role for ESCRTs in eukaryogenesis.

47

48

49 INTRODUCTION

50

51 The Asgard superphyla, manifest a unique branch that, according to current  
52 evolutionary theories, is considered to be the closest prokaryotic relative of eukaryotes.  
53 All Asgard archaeal species were found to encode for Eukaryotic Signature Proteins  
54 (ESPs), that carry cellular functions that until recently were considered as exclusive to  
55 eukaryotes (1-3). Thus, Asgard proteins potentially hold the core functions of ancient  
56 eukaryotic cellular machines. Of particular interest, are ESPs with membrane  
57 remodelling capabilities, as these proteins may contribute to the establishment of  
58 cellular compartmentalization during eukaryogenesis. Indeed, Asgard archaea encode  
59 for several eukaryotic membrane remodelling machineries including the SNARE  
60 complex, BAR domains proteins and the ESCRT machinery (1, 3, 4). Among these  
61 machineries, ESCRTs are the most conserved and are encoded by all Asgard species

62 discovered up to date, suggesting that they carry essential functions in these unique  
63 prokaryotes (5, 6).

64

65 The ESCRT machinery constitute one of the most robust and versatile cellular  
66 apparatus for membrane constriction and fission. Proteins of the machinery are  
67 encoded by all domains of life and were shown to mediate membrane remodelling in a  
68 wide range of eukaryotic cellular membranes including plasma membrane, nuclear  
69 membrane and endocytic membranes (7, 8). Moreover, ESCRT-mediated processes  
70 span a large spectrum of length scales, from less than 100 nm for vesicle release to up  
71 to 1  $\mu\text{m}$  for cell division. How the ESCRT complex mediate membrane remodelling in  
72 this large landscape of membrane sources and length scales is mostly unknown (9).

73

74 The eukaryotic ESCRT system is composed of five subfamilies, i.e. ESCRT 0-III and the  
75 AAA-ATPase VPS4. Within this complex, ESCRT-III (named CHMPs in animal cells)  
76 and VPS4 manifest the minimal unit required for driving membrane fission (9, 10).

77 According to current models, membrane constriction and scission are mediated by  
78 polymerization of ESCRT-III proteins into helical hetero-filaments and their remodelling  
79 by VPS4 (10-14). Indeed, ESCRT-III proteins have been shown organize in helical  
80 filaments and tubes both in vitro and in cells (14-19). However, the large number of  
81 proteins within the ESCRT-III subfamily —twelve in humans and eight in yeast - have  
82 challenged mechanistic studies of the basic function of the machine.

83

84 Reduced, simplified ESCRT-III systems have been identified in prokaryotes including in  
85 bacteria and archaea (named Vipp1 and PspA in bacteria and CdvB in archaea) (7, 20,  
86 21). While the bacterial homologs were shown to remodel membranes in vitro, no VPS4  
87 was identified in this system so far, and whether these distant homologs can sever  
88 membranes has not been clarified. ESCRTs encoded by TACK archaea were shown to  
89 participate in cell division, suggesting functional similarities between the eukaryotic and  
90 archaeal ESCRT systems (22-25). Within the archaeal domain the Asgard ESCRT  
91 system is considerably closer to the eukaryotic system. While all other archaea encode  
92 only for homologs of the ESCRT-III/VPS4 module, Asgard archaea encode for

93 homologs of the complete ESCRT system (ESCRT-I-III and VPS4) (6, 7). Additionally,  
94 the sequence of Asgard ESCRT-III/VPS4 proteins is more closely related to those of  
95 eukaryotes than to other archaeal ESCRT systems (the CDV system) (5, 20). Lastly,  
96 VPS4 homologs of Asgard archaea were shown to functionally interact with eukaryotic  
97 ESCRTs in both yeast and mammalian cells (5, 26). Notably, the Asgard ESCRT-III  
98 subfamily is substantially reduced compared to eukaryotes with only two ESCRT-III  
99 proteins (named here CHMP1-3 and CHMP4-7) encoded in some species including  
100 Loki and Heimdall archaeota (1, 5, 7, 26). Hence, the Asgard ESCRT system  
101 constitutes a minimalist ESCRT machinery that may hold the core capabilities of  
102 eukaryotic ESCRTs and could have been involved in membrane remodelling processes  
103 that occurred during eukaryogenesis. Yet, the function, organization, and properties of  
104 Asgard ESCRT-III complexes as well as their ability to remodel membranes are mostly  
105 unknown.

106

107 In this work, we provide the first evidence that Asgard ESCRT-III complexes share  
108 functional similarities with eukaryotic ESCRTs. Using purified ESCRT-III homologs  
109 encoded by the most abundant Asgard phyla, Lokiarchaeota (Loki), we show that the  
110 Asgard ESCRT-III protein CHMP4-7 self-assemble into homo- and hetero- helical tubes  
111 that resemble those of eukaryotes (15, 18, 19, 27). The proportion of helical tubes was  
112 dramatically enriched in the presence of short DNA oligos, while no filaments could be  
113 observed upon DNase treatment. Notably, Loki ESCRT filaments, formed under any of  
114 these conditions, were able to bind and deform small unilamellar vesicles (SUVs)  
115 comprised of eukaryotic-like synthetic phospholipids. Hence, Loki ESCRT-III assemble  
116 into helical filaments that are affected by oligonucleotides and are capable of  
117 remodelling eukaryotic-like membranes.

118

119

## 120 RESULTS

121

122 Eukaryotic ESCRT-III proteins polymerize into helical filaments - a hallmark of ESCRT-  
123 III organization that is thought to be essential for their function in membrane remodeling

124 (8, 28). Polymerization is mediated by the snf7 domain that is conserved in both  
125 archaea and eukaryotes, but the polymerization properties of Asgard ESCRT-III has not  
126 been examined (5, 20, 26). To investigate the assembly properties of Asgard ESCRT-III  
127 proteins, we purified recombinant versions of the ESCRT-III proteins CHMP4-7 and  
128 CHMP 1-3, encoded by the Loki GC14\_75 strain (KKK44605.1 and KKK42122.1,  
129 respectively). Using our assay conditions (see material and methods), full length CHMP  
130 4-7 self-assembled into filaments (Fig 1). No filaments were observed under the same  
131 conditions using full length CHMP1-3 (sup Fig. 1A). In negative stain TEM images,  
132 CHMP 4-7 was predominantly seen in either long, thin filaments or rod-shaped tubes  
133 (Fig 1A, see arrows). A pattern of parallel, periodic stripes was detected in the CHMP 4-  
134 7 tube structures by cryo-EM, supporting a helical tube organization (Fig 1B, C). The  
135 outer diameter of the CHMP4-7 tubes was variable, ranging between 35 to 55 nm  
136 (averaged diameter  $44\text{nm} \pm 30.9$ ). Tube length was typically between 300 - 450 nm (Fig  
137 1D). The overall shape of CHMP4-7 helical tubes resembled the helical tubes previously  
138 described for eukaryotic or bacterial ESCRT-III filaments (15, 18, 19, 29). The diameter  
139 of Loki CHMP 4-7 helical tubes was slightly larger than the diameters measured for  
140 human CHMP1B (~25nm) or the bacterial ESCRT III homologs PspA (~21 nm), but was  
141 in the range of diameters measured for human CHMP2A-CHMP3 (38-43 nm) (18, 19,  
142 29). Collectively, these data indicate that Loki CHMP 4-7 spontaneously self-assemble  
143 into the typical helical tube organization described for the ESCRT-III complex.

144

145 Next, we examined whether, similar to their human homologs, Loki ESCRT-IIIs can  
146 assemble into co-polymers (18, 19). To this end, full lengths Loki CHMP4-7 and CHMP  
147 1-3 were incubated at different ratios. While no filaments were seen at 1:1 CHMP4-7-  
148 CHMP1-3 ratio, helical tubes could be readily observed at 2:1, 4:1 and 6:1 ratios (Fig 2  
149 and Sup Fig 1B). Notably, CHMP 4-7-CHMP 1-3 helical tubes exhibited different  
150 properties than those observed for the CHMP 4-7 homo-polymer. First, their outer  
151 diameter was significantly smaller and less diverse (CHMP 4-7-CHMP 1-3 2:1 ratio,  
152  $31 \pm 7.7$ ) (Fig. 2B, left panel). Second, helical tubes formed in the presence of both  
153 CHMP4-7 and CHMP1-3 were significantly longer than those formed by the CHMP4-7  
154 homo-polymer (>X1.5 folds increase for 2:1 and 4:1 ratios) (Fig. 2B, right panel). Third,

155 the morphology of the CHMP4-7-CHMP1-3 helical tube was slightly different: tubes  
156 appeared to be more curved and the periodic stripes, which could only be observed by  
157 cryo-EM for CHMP 4-7 homo-polymers, were readily detected in negative stain images  
158 of the co-polymer, suggesting that packing of the helical tube is less tight in the  
159 presence of CHMP1-3 (Fig 2A). These phenotypic changes were not induced upon  
160 substituting CHMP 1-3 with purified GFP, suggesting that they are specifically  
161 contributed by CHMP 1-3 (Sup. Fig 1C). We therefore concluded that Loki ESCRT-III  
162 proteins assemble into helical tubes composed of homo- and co-polymers with the co-  
163 polymers forming longer, narrower, and more homogenous tubes than the homo-  
164 polymer. These findings are in line with previous observations obtained for human  
165 ESCRT-III CHMP1B homo- and co-polymers (in the presence of IST1), which also  
166 formed a narrower, more uniform tubes in the co-polymer composition (30). The  
167 realization that both human and Asgard ESCRT-III proteins assemble into homo-and  
168 co- polymers with the latter adopting a narrower more uniform tube shape, strongly  
169 suggests that this is a basic, conserved property of the ESCRT-III system.

170  
171 Recent work from our laboratory showed that purified Loki CHMP4-7 binds short DNA  
172 oligonucleotides (26). Human CHMP1B, exhibited similar properties and a recently  
173 solved cryo-EM structure of human CHMP1B/IST1 filaments demonstrated direct  
174 interactions between the ESCRT-III filament and nucleic acids (26, 31). We, therefore,  
175 set to examine the effect of short DNA oligonucleotides on the self-assembly properties  
176 of Asgard ESCRT-III filaments. A significant increase in helical tube assemblies was  
177 observed for the co-polymer in the presence of ssDNA, in both negative stain- and cryo-  
178 TEM images (Fig 3A-B and Sup Fig 2A). More helical tubes were also observed upon  
179 addition of dsDNA, but to a lower extent. No filaments were observed when incubating  
180 CHMP1-3 with DNA, indicating that that observed increase in helical tubes do not result  
181 from self-assembly of CHMP1-3 into homo-polymers (Sup Fig. 2D). Addition of ssDNA  
182 to CHMP4-7 homo-polymers also led to a dramatic increase in helical tubes, indicating  
183 that the effect of DNA is not restricted to the co-polymer (Fig. 3C, Sup Fig 2B). The  
184 presence of DNA also affected the properties of the helical tubes. CHMP 4-7-CHMP1-3  
185 helical tubes formed in the presence of either ds- or ss- DNA exhibited larger and more

186 variable diameters ( $43.9\text{nm} \pm 58$  for CHMP4-7-CHMP1-3 2:1 ssDNA vs CHMP4-7-  
187 CHMP1-3 2:1  $31\text{nm} \pm 7.7$ ), resembling the diameter measured for the CHMP 4-7 homo-  
188 polymer (CHMP4-7  $44\text{nm} \pm 30.9$ ) (Fig. 3D). Moreover, filaments were less curved, and  
189 the periodic stripes observed in negative stain images in the co-polymer could not be  
190 observed (Fig 3A). Addition of DNA did not affect the characteristics length or diameter  
191 of tubes formed by CHMP 4-7 homo-polymers (Fig. 3D-E). It, therefore, appears that  
192 DNA aids the organization of Loki-ESCRT-III proteins into helical tubes and counteract,  
193 at least to some extent, the effect of CHMP1-3 on tube characteristics.

194  
195 To further investigate the possible effect of DNA on Loki ESCRT-III polymerization, we  
196 performed the self-assembly reaction in the presence of DNase. Surprisingly, filament  
197 formation was completely abolished for both homo- and co-polymers in the presence of  
198 DNase (Fig 3F and Sup Fig. 2E-F). Additionally, no filaments were observed upon  
199 incubation with DNase post self-assembly, suggesting that filament stability and/or  
200 integrity are dependent on DNA. Altogether, these findings strongly suggest that DNA is  
201 an essential component of Loki ESCRT-III filamentous organization.

202  
203 Eukaryotic ESCRT-IIIs were shown to bind and deform membranes *in vitro* and in cells  
204 (28). To determine whether ESCRTs encoded by Asgard archaea carry the ability to  
205 remodel membranes, we incubated Loki ESCRT-III pre-assembled filaments with small  
206 unilamellar vesicles (SUVs,  $\sim 100$  nm) composed of negatively charged eukaryotic-like  
207 phospholipids (1:1, PC:PS). Under these conditions, ESCRT-III filaments, assembled  
208 under any of the conditions described above (including in the presence of DNA), were  
209 found to intimately interact with SUVs (Fig. 4A, B and Sup Fig. 3). We identified four  
210 main types of ESCRT-III-SUV interactions: (1) Attachment of the SUV to the outside  
211 surface of the tube, which was associated with flattening of the vesicle at the filament-  
212 vesicle interface; (2) Docking of the SUV at the tip of the helical tube; (3) Invagination of  
213 the SUV to the interior of the ESCRT-III tube; and (4) Dramatic remodeling of both the  
214 SUV and the ESCRT-III tube (see examples in Fig. 4C, left panel). Combinations of  
215 several types of interactions on the same filament were also observed, indicating that  
216 these interactions are not mutually exclusive. Moreover, a docked SUV that invaginates

217 the helical tube was observed occasionally (Fig. 4B, left panel and sup movies 1, 2),  
218 suggesting that these two types of interactions represent successive steps.  
219 Invaginations of more than one vesicle to the same tube could be observed, in cryo-  
220 TEM and cryo-tomography reconstructions, giving rise to the formation of a complex  
221 membrane system with several vesicles internalized into one another (Fig 4B, and sup  
222 movies 1, 2). In these complex organizations, which were often accompanied by a  
223 considerable deformation of both the filament and the vesicles, the characteristics  
224 periodic stripes of the ESCRT-III filament could often be detected at the exterior of the  
225 filament-vesicle complex, suggesting that the observed morphologies result from  
226 internalization of vesicles into the ESCRT-III helical tube followed by deformation of the  
227 tube. Loki ESCRT III filaments also interacted with neutrally charged SUVs (100% PC)  
228 but to a much lower extent, exhibiting predominantly binding of the SUV on the outside  
229 of the helical tube (Sup Fig. 4). Therefore, Loki ESCRT-III filaments associate with  
230 eukaryotic-like membrane vesicles, and deform negatively charged vesicles via the  
231 interior of the tube (see proposed model in Fig. 4D).

232  
233 Last, we asked whether the composition of ESCRT-III helical tubes, described here,  
234 affect their capabilities to remodel membranes. Because vesicle-filaments interactions  
235 were identified under all conditions, we analyzed the proportion of the four types of  
236 filament-vesicle interaction, we identified, in different ESCRT-III compositions. No  
237 difference was observed in the distributions of homo- and co- polymers, suggesting that  
238 the composition of the filament does not significantly affect membrane indications. The  
239 presence of DNA affected the distributions of ESCRT-III-SUV interactions in both the  
240 homo- and co- polymers, as follows (Fig. 4C): (1) The association of vesicles with the  
241 outside surface of the helical tube was considerably enriched (outside, type 1, No DNA,  
242 <15%; with DNA, >35%). (2) Interactions with the tip of the filament (docking, type 2)  
243 and invagination of the vesicle (inside, type 3) were significantly enriched. (3) The  
244 extent of complete remodeling events (remodeling, type 4) was dramatically reduced  
245 (with DNA, ~5%; no DNA ~80%). Therefore, homo- and co- Loki ESCRT-III filaments  
246 are capable of interacting and remodeling lipid membranes, both in the presence and



247 absence of DNA, but the extent of remodeling appear to be attenuated by the presence  
248 of DNA.

249

## 250 DISCUSSION

251

252 In this work, we provide the first evidence to show that, similar to their eukaryotic  
253 homologs, Asgard ESCRT-III proteins assemble into helical filaments that remodel  
254 membranes. These findings confirm that ESCRT homologs encoded by Asgard archaea  
255 are functionally related to their eukaryotic homologs. We further provide data to support  
256 prominent role for DNA in the Asgard ESCRT-III system. Finally, by using SUVs  
257 composed of eukaryotic phospholipids, which are fundamentally different from archaeal  
258 lipids, we demonstrate that the Asgard ESCRT-III could, in-principle, contribute to the  
259 membrane remodeling processes that occurred during eukaryogenesis and gave rise to  
260 the complex phospholipids-based endomembrane system of eukaryotes.

261

262 Our data point to similarities between the human and Asgard ESCRT-III systems. First,  
263 the nature of self-assembly appear to be conserved. Similar to the human CHMP1B-  
264 IST1 complex, Loki CHMP4-7 was found to polymerize alone or in the presence of  
265 CHMP 1-3, with the homo-polymer exhibiting a wider, more variable diameter compared  
266 to the co-polymer (30). What controls the diameter of the ESCRT-III helical tube is  
267 currently unknown. Our findings that, similar to their human homologs, Asgard ESCRT-  
268 III homo-filaments can adopt a wide range of diameters that can be tuned by the  
269 addition of another ESCRT-III components, strongly suggest that this is a conserved  
270 feature of the ESCRT-III system. Therefore, a basic feature of the ESCRT-III system  
271 may be their ability to assemble into flexible homo filaments that can be tuned to adopt  
272 different shapes by incorporating additional ESCRT-III proteins into the polymer. Such a  
273 model can explain how the ESCRT-III system execute the large repertoire of membrane  
274 remodeling processes in cells, which greatly vary in scales and topologies (7, 8).  
275 The topology of membrane binding, described here for Loki ESCRT-IIIs, resemble the  
276 topology reported for the human CHMP1B-IST1 polymer, i.e. bindings via the interior of  
277 the helical tube (30). This topology is reversed to the conventional topology attributed to

278 the ESCRT complex and that was described for the CHMP2A-CHMP3 co-polymer (19,  
279 27), which is binding and deforming membranes via the external surface of the tube.  
280 Reversed membrane binding topology was also recently reported for the bacterial  
281 ESCRT-III homologs Vipp1 and PspA (29, 32). Whether this topology represent the  
282 preferred topology of ancient ESCRTs or is a consequence of the experimental, in vitro,  
283 system is yet to be determined. Regardless, these similarities suggest that the ESCRT-  
284 III membrane remodeling properties reported here are a common property of the  
285 ESCRT system, conserved in all domains of life.

286

287 Our results highlight DNA as an essential Loki ESCRT-III partner. Organization of both  
288 homo- and co- ESCRT-III polymers into helical tubes was enhanced in the presence of  
289 short DNA oligonucleotides and helical tube formation was completely blocked upon  
290 addition of DNase. Whether DNA has a role in stabilizing Loki ESCRT-III filaments or in  
291 facilitating their nucleation is still unknown. Notably, human CHMP1B-IST1 filaments  
292 were shown to bind DNA in the inner side of the tube (31). Additionally, nucleotides  
293 were recently resolved in cryo-EM structures of the bacterial ESCRT-III Vipp1 and were  
294 suggested to play a role in helical tube stabilization (32). It is therefore tempting to  
295 speculate that nucleotide binding is an additional core property of the ESCRT-III  
296 machine that is conserved in all domains of life.

297

298 Our data show that Loki ESCRT-III filaments that polymerized in the presence of DNA  
299 were able to bind and deform membrane vesicles. Yet, the extent of membrane  
300 deformation that occurred inside the tube was attenuated, while binding on the exterior  
301 of the ESCRT-III tube was enhanced. These results are consistent with competition of  
302 DNA and membranes over the same binding sites, located at the interior of the tube, as  
303 recently suggested for human CHMP1B (31). Alternatively, the presence of DNA may  
304 change the biophysical properties of the tube, thereby resisting the deformation of the  
305 tube needed to facilitate membrane remodeling from within. Future experiments  
306 allowing direct visualization of ESCRT-III proteins, DNA and the membrane at high  
307 resolution are needed in order to examine these models and to resolve the intimate  
308 relationship between these three partners.

309

310 Overall, the Loki ESCRT-III filaments characterized here, share more similar  
311 characteristics to human CHMP1B-IST1 filaments than to human CHMP2A-CHMP3 or  
312 yeast snf7 (human CHMP4B) filaments. Filaments of both Asgard ESCRT-III and  
313 human CHMP1B, were shown to assemble into homo- and co- polymers with the latter  
314 being more constricted; both filaments were reported to bind DNA in vitro; and both  
315 deformed membranes via binding to the inner side of the filamentous tube. Consistently,  
316 we recently showed that both Loki CHMP4-7 and human CHMP1B associate with  
317 chromatin when expressed in mammalian cells (26). We therefore suggest that Asgard  
318 ESCRT-IIIs are functionally most similar to CHMP1B in the eukaryotic ESCRT-III  
319 system.

320

321 The biological function of Asgard ESCRTs has yet to be defined. The findings that Loki  
322 ESCRT-III filaments can bind both DNA and membranes raises a few attractive  
323 possibilities. First, given the established role of ESCRTs in cell division in TACK  
324 archaea and in eukaryotes, it is possible that the ESCRT machinery manifest a basic  
325 cell division machinery capable of orchestrating DNA segregation and membrane  
326 splitting (22-25). In this regard, the ability of DNA to retain extensive membrane  
327 deformation may represent a biological mechanism to avoid premature membrane  
328 constriction during cell division. Second, the ESCRT complex may have been involved  
329 in nuclear membrane formation during eukaryogenesis, by bringing together  
330 membranes and DNA and facilitating DNA encapsulation by membranes. In this  
331 respect, mammalian ESCRT-III proteins have been shown to mediate sealing of the  
332 nuclear membrane post cell division and to regulate the attachment of heterochromatin  
333 to the newly formed nuclear envelop (33-35). Moreover, we recently reported that Loki  
334 CHMP 4-7 is targeted to the nucleus when over expressed in eukaryotic cells (26).  
335 Finally, the membrane binding experiments performed here were done using  
336 eukaryotic-like phospholipids, which are fundamentally different from archaeal lipids but  
337 may resemble the lipid composition of the newly formed nuclear membrane. Therefore,  
338 the ESCRT-III system encoded by Asgard archaea could have contributed to the

339 membrane remodeling that occurred during the formation of the phospholipids-based  
340 nuclear membrane.

341

## 342 MATERIALS AND METHODS

### 343 Cloning

344 Open reading frames (ORFs) from Loki MAG sp. GC14\_75, encoding for CHMP1-3 and  
345 CHMP4-7 genes were obtained from NCBI (accession numbers KKK42122.1,  
346 KKK44605.1, respectively) were amplified by PCR and sub-cloned into pSH21 vector  
347 subsequently to the TEV cleavage tag that followed an N terminal polyhistidine and  
348 MBP protein tags (a kind gift from Eyal Gur, BGU, Israel)(36). Plasmids were verified by  
349 sequencing.

350

### 351 Protein Expression and Purification

352 pSH21 plasmids containing Loki CHMP1-3 or CHMP4-7 were expressed Escherichia  
353 coli BL21 strain and incubated in LB 50 µg/mL Ampicillin at 37°C until reaching O.D. of  
354 0.6. Then, induction with 0.5 mM IPTG was performed and the cultures were grown at  
355 30°C for 3-4 hours. Cells were then resuspended and lysed by sonication in buffer A (25  
356 mM Hepes pH= 8, 500 mM NaCl, 10% glycerol, 15 mM 2-mercaptoethanol, 10 mM  
357 imidazole) supplemented with protease inhibitor cocktail (cOmplete ultra-tablets, EDTA-  
358 free, Roche) and 500 µg/ml DNase I (10104159001; Roche Diagnosis GmbH, Mannheim,  
359 Germany), and the supernatant was clarified by centrifugation (25,000 g, 40 mins, 4°C).  
360 For CHMP4-7 purification, supernatant was subjected to HisPur™ Ni-NTA Resin  
361 (88222; Thermo Fisher Scientific, Weltham, MA) column and eluted in buffer B (buffer A  
362 supplemented with 50 mM imidazole). Protein tags were then removed using a TEV  
363 protease (1 mg/10 mg protein) in buffer C (50mM Tris-HCL pH=7.4, 10% glycerol, 500  
364 mM NaCl, 15 mM 2-mercaptoethanol). Finally, a second Ni-NTA step was performed  
365 using buffer C and the flow-through was collected.  
366 For CHMP1-3 purification, supernatant was subjected to Ni-NTA column and eluted in  
367 buffer B. Samples were then subjected to amylose resin (E8021; NEB, Frankfurt,  
368 Germany) in buffer D (20mM Tris pH=7.4, 500 mM NaCl, 10mM β-Mercaptoethanol,  
369 10% Glycerol) and eluted in buffer D supplemented with 10mM maltose. Protein tags

370 were then removed using a TEV protease (1 mg/10 mg protein) in buffer C (50mM Tris-  
371 HCL pH=7.4, 10% glycerol, 500 mM NaCl, 15 mM 2-mercaptoethanol). Finally, a  
372 second Ni-NTA step was performed using buffer C and the flow-through was collected.  
373 Purified proteins were verified my mass spectrometry.

374

375 For polymerization, proteins were incubated in buffer E (25mM Tris pH=7.6, 50 mM KCl)  
376 for 5 hours at RT at the indicated conditions. For DNA experiments,  
377 ATCCACCTGTACATCAACTCGCCCGGCGGCTCGATCAGCG (40 bases probe), ss or  
378 ds were used at the indicted concentrations. DNase I (10104159001; Roche Diagnosis  
379 GmbH, Mannheim, Germany) was added at 20mg/ml concentrations when indicated.

380

### 381 **Preparation of small unilamellar vesicles (SUVs)**

382 Chloroform Lipid solutions (DOPC or DOPS) were purchased from Avanti Polar Lipids  
383 Inc. (Albaster, AL, USA catalog number 850375, 840035). Lipid mixtures of  
384 DOPC/DOPS 1:1 molar ratio and pure DOPC were prepared at a total concentration of  
385 1 mg/ml in Tris 20 mM, KCl 50 mM, pH 7.8 were prepared. Each lipid suspension was  
386 extruded 20 times via a 100 nm polycarbonate membrane using a mini-extruder (Avanti  
387 Polar Lipids, Alabaster, AL, USA). In the final stage, the vesicles were mixed with the  
388 Asgard Loki ESCRT-III filaments. All experiments were done with 8  $\mu$ M ESCRT-III and  
389 124  $\mu$ M vesicles in a buffer of Tris 25 mM, KCl 50 mM, at pH 7.6.

390

### 391 **Negative Stain grid preparation and imaging**

392 The negative stain samples for TEM analysis were prepared in the following way: 300  
393 mesh copper grids (Ted Pella, Prod No. 01813-F) were glow discharged to enhance  
394 hydrophilicity of their surface. Next, 2.5 uL of the sample was applied on to the grid and  
395 the excess liquid was blotted with filter paper after 1 minute. The grid was dried in air for  
396 1 minute, following by applying 5 uL of uranyl acetate 2% solution (SPI CAS# 6159-44-  
397 0) for negative staining to increase the sample contrast. Next, the grid was blotted ones  
398 more to remove the excess uranyl acetate. Finally, the grid was dried in air before  
399 insertion into the microscope. The imaging of the samples was performed with Thermo

400 Fisher Scientific Talos F200C transmission electron microscope operating at 200 kV.  
401 The images were taken with Ceta 16M CMOS camera.

402

### 403 **Cryo-electron microscopy**

404 Sample preparation: 3  $\mu\text{L}$  of proteins / proteins-phospholipids mix samples were gently  
405 deposited on glow discharged Quantifoil R 1.2/1.3 holey carbon grids (Quantifoil Micro  
406 Tools GmbH, Germany). Samples were manually blotted for four seconds at room  
407 temperature and vitrified by rapidly plunging into liquid ethane using a home-built  
408 plunging apparatus. The frozen samples were stored in liquid nitrogen until imaging.

409 **Micrographs acquisition:** Samples were loaded under cryogenic conditions and  
410 imaged in low dose mode on a FEI Tecnai F30 Polara microscope (FEI, Eindhoven)  
411 operated at 300 kV. Micrographs were collected using SerialEM, at a calibrated pixel  
412 size of 1.1  $\text{\AA}$  by a K2 Summit direct electron detector fitted behind an energy filter  
413 (Gatan Quantum GIF) set to  $\pm 10$  eV around zero-loss peak with total electron dose of  
414  $80 \text{ e}^-/\text{\AA}^2$ . Each dose-fractionated movie had 50 frames, micrographs sums were aligned  
415 in SerialEM.

416

417 **Cryo-tomography.** Micrographs were acquired with a FEI Tecnai F30 Polara  
418 microscope (FEI, Eindhoven) operated at 300 kV, using a K2 Summit direct electron  
419 detector fitted behind an energy filter (Gatan Quantum GIF), set to  $\pm 10$  eV slit around  
420 the zero-loss peak. Pixel size at the sample plane was 2.3  $\text{\AA}$ . The camera was operated  
421 in counting mode at a dose rate of 6–7  $\text{e}^-/\text{pixels}/\text{sec}$ . Tilt series of 41 exposures from  
422  $-21^\circ$  to  $+60^\circ$  and back to  $-60^\circ$  in  $3^\circ$  intervals and a total dose of  $\sim 120 \text{ e}^-/\text{\AA}^2$  were  
423 collected with Serial-EM. Tilt series were aligned, and tomograms were reconstructed  
424 using eTomo (IMOD4.11 package) (37). Movies were generated in imageJ.

425

### 426 **Measurements and statistical analysis**

427 Filament length and diameter measurements were performed in Velox software version  
428 3.5 (Thermo Fisher Scientific, Inc.).

429 Statistical analysis was performed in Graph Pad Prism version 9.00 (La Jolla, CA,  
430 USA). Unless specified otherwise, comparison between two groups was calculated by

431 one way ANOVA \* p- value  $\leq 0.1$ , \*\*p- value  $\leq 0.01$ , \*\*\*p- value  $\leq 0.001$ , \*\*\*\*p-  
432 value  $\leq 0.0001$ .

433

#### 434 ACKNOWLEDGMENTS

435

436 We thank the laboratories of Eyal Gur (BGU) and Eyal Arbely (BGU) for their practical  
437 advice on proteins expression and purifications and for kindly sharing their reagents and  
438 equipment with us. We also thank Itzik Mizrahi (BGU) and Ori Avinoam (WIS) for  
439 constructive feedback on the project. Last, we thank all members of the Elia lab for  
440 critical feedback throughout the project. The Elia laboratory is funded by the Israeli  
441 Science Foundation (ISF) Grant no. 1323/18. ABG is grateful to the Israel Science  
442 Foundation for financial support (grant 2101/20).

443

#### 444 AUTHOR CONTRIBUTIONS

445

446 NE and DN conceptualized the project. NM performed and analyzed all experiments.  
447 GH and AB, were in charge of experiments using SUVs. AU acquired negative stain  
448 TEM images. RZ acquired and analyzed cryo-EM data. NE, DN, AB and RZ were  
449 involved in experimental design and data analysis. NE wrote the manuscript. All authors  
450 read and revised the manuscript.

451

452 Competing Interest Statement: We declare no competing interest

453

454

455

456

457

458

459

#### 460 REFERENCES

- 461 1. K. Zaremba-Niedzwiedzka *et al.*, Asgard archaea illuminate the origin of eukaryotic  
462 cellular complexity. *Nature* **541**, 353-358 (2017).
- 463 2. F. MacLeod, G. S. Kindler, H. L. Wong, R. Chen, B. P. Burns, Asgard archaea: Diversity,  
464 function, and evolutionary implications in a range of microbiomes. *AIMS Microbiol* **5**, 48-  
465 61 (2019).
- 466 3. A. Spang *et al.*, Complex archaea that bridge the gap between prokaryotes and  
467 eukaryotes. *Nature* **521**, 173-179 (2015).
- 468 4. E. Neveu, D. Khalifeh, N. Salamin, D. Fasshauer, Prototypic SNARE Proteins Are Encoded  
469 in the Genomes of Heimdallarchaeota, Potentially Bridging the Gap between the  
470 Prokaryotes and Eukaryotes. *Curr Biol* **30**, 2468-2480 e2465 (2020).
- 471 5. Z. Lu *et al.*, Coevolution of Eukaryote-like Vps4 and ESCRT-III Subunits in the Asgard  
472 Archaea. *mBio* **11** (2020).
- 473 6. T. Hatano *et al.*, Asgard archaea shed light on the evolutionary origins of the eukaryotic  
474 ubiquitin-ESCRT machinery. *Nat Commun* **13**, 3398 (2022).
- 475 7. Y. Caspi, C. Dekker, Dividing the Archaeal Way: The Ancient Cdv Cell-Division Machinery.  
476 *Front Microbiol* **9**, 174 (2018).
- 477 8. J. H. Hurley, ESCRTs are everywhere. *EMBO J* **34**, 2398-2407 (2015).
- 478 9. Y. A. M. Alonso, S. M. Migliano, D. Teis, ESCRT-III and Vps4: a dynamic multipurpose tool  
479 for membrane budding and scission. *FEBS J* **283**, 3288-3302 (2016).
- 480 10. J. McCullough, L. A. Colf, W. I. Sundquist, Membrane fission reactions of the mammalian  
481 ESCRT pathway. *Annu Rev Biochem* **82**, 663-692 (2013).
- 482 11. C. Caillat, S. Maity, N. Miguet, W. H. Roos, W. Weissenhorn, The role of VPS4 in ESCRT-III  
483 polymer remodeling. *Biochem Soc Trans* **47**, 441-448 (2019).
- 484 12. S. Maity *et al.*, VPS4 triggers constriction and cleavage of ESCRT-III helical filaments. *Sci*  
485 *Adv* **5**, eaau7198 (2019).
- 486 13. B. E. Mierzwa *et al.*, Dynamic subunit turnover in ESCRT-III assemblies is regulated by  
487 Vps4 to mediate membrane remodelling during cytokinesis. *Nat Cell Biol* **19**, 787-798  
488 (2017).
- 489 14. A. K. Pfitzner *et al.*, An ESCRT-III Polymerization Sequence Drives Membrane  
490 Deformation and Fission. *Cell* **182**, 1140-1155 e1118 (2020).
- 491 15. W. M. Henne, N. J. Buchkovich, Y. Zhao, S. D. Emr, The endosomal sorting complex  
492 ESCRT-II mediates the assembly and architecture of ESCRT-III helices. *Cell* **151**, 356-371  
493 (2012).
- 494 16. I. Goliand *et al.*, Resolving ESCRT-III Spirals at the Intercellular Bridge of Dividing Cells  
495 Using 3D STORM. *Cell Rep* **24**, 1756-1764 (2018).
- 496 17. J. Guizetti *et al.*, Cortical constriction during abscission involves helices of ESCRT-III-  
497 dependent filaments. *Science* **331**, 1616-1620 (2011).
- 498 18. J. McCullough *et al.*, Structure and membrane remodeling activity of ESCRT-III helical  
499 polymers. *Science* **350**, 1548-1551 (2015).
- 500 19. S. Lata *et al.*, Helical structures of ESCRT-III are disassembled by VPS4. *Science* **321**,  
501 1354-1357 (2008).
- 502 20. B. P. Frohn, T. Hartel, J. Cox, P. Schwillle, Tracing back variations in archaeal ESCRT-based  
503 cell division to protein domain architectures. *PLoS One* **17**, e0266395 (2022).



- 504 21. J. Liu *et al.*, Bacterial Vipp1 and PspA are members of the ancient ESCRT-III membrane-  
505 remodeling superfamily. *Cell* **184**, 3660-3673 e3618 (2021).
- 506 22. A. C. Lindas, E. A. Karlsson, M. T. Lindgren, T. J. Ettema, R. Bernander, A unique cell  
507 division machinery in the Archaea. *Proc Natl Acad Sci U S A* **105**, 18942-18946 (2008).
- 508 23. R. Y. Samson, T. Obita, S. M. Freund, R. L. Williams, S. D. Bell, A role for the ESCRT  
509 system in cell division in archaea. *Science* **322**, 1710-1713 (2008).
- 510 24. R. Y. Samson *et al.*, Molecular and structural basis of ESCRT-III recruitment to  
511 membranes during archaeal cell division. *Mol Cell* **41**, 186-196 (2011).
- 512 25. G. Tarrason Risa *et al.*, The proteasome controls ESCRT-III-mediated cell division in an  
513 archaeon. *Science* **369** (2020).
- 514 26. D. Nachmias *et al.* (2022) Asgard ESCRT-III and VPS4 reveal evolutionary conserved  
515 chromatin binding properties of the ESCRT machinery. in *bioRxiv*
- 516 27. K. Azad *et al.* (2022) Structural basis of CHMP2A-CHMP3 ESCRT-III polymer assembly and  
517 membrane cleavage. in *bioRxiv*.
- 518 28. Y. Olmos, The ESCRT Machinery: Remodeling, Repairing, and Sealing Membranes.  
519 *Membranes (Basel)* **12** (2022).
- 520 29. B. Junglas *et al.*, PspA adopts an ESCRT-III-like fold and remodels bacterial membranes.  
521 *Cell* **184**, 3674-3688 e3618 (2021).
- 522 30. H. C. Nguyen *et al.*, Membrane constriction and thinning by sequential ESCRT-III  
523 polymerization. *Nat Struct Mol Biol* **27**, 392-399 (2020).
- 524 31. N. Talledge *et al.* (2018) The ESCRT-III proteins IST1 and CHMP1B assemble  
525 around nucleic acids. in *bioRxiv*.
- 526 32. T. K. Gupta *et al.*, Structural basis for VIPP1 oligomerization and maintenance of  
527 thylakoid membrane integrity. *Cell* **184**, 3643-3659 e3623 (2021).
- 528 33. G. H. Pieper, S. Sprenger, D. Teis, S. Oliferenko, ESCRT-III/Vps4 Controls  
529 Heterochromatin-Nuclear Envelope Attachments. *Dev Cell* **53**, 27-41 e26 (2020).
- 530 34. Y. Olmos, L. Hodgson, J. Mantell, P. Verkade, J. G. Carlton, ESCRT-III controls nuclear  
531 envelope reformation. *Nature* **522**, 236-239 (2015).
- 532 35. M. Vietri *et al.*, Spastin and ESCRT-III coordinate mitotic spindle disassembly and nuclear  
533 envelope sealing. *Nature* **522**, 231-235 (2015).
- 534 36. Y. Elharar *et al.*, Survival of mycobacteria depends on proteasome-mediated amino acid  
535 recycling under nutrient limitation. *EMBO J* **33**, 1802-1814 (2014).
- 536 37. D. N. Mastronarde, Automated electron microscope tomography using robust prediction  
537 of specimen movements. *J Struct Biol* **152**, 36-51 (2005).

538

539

540

541

542

543

544

545 FIGURES AND FIGURES LEGENDS

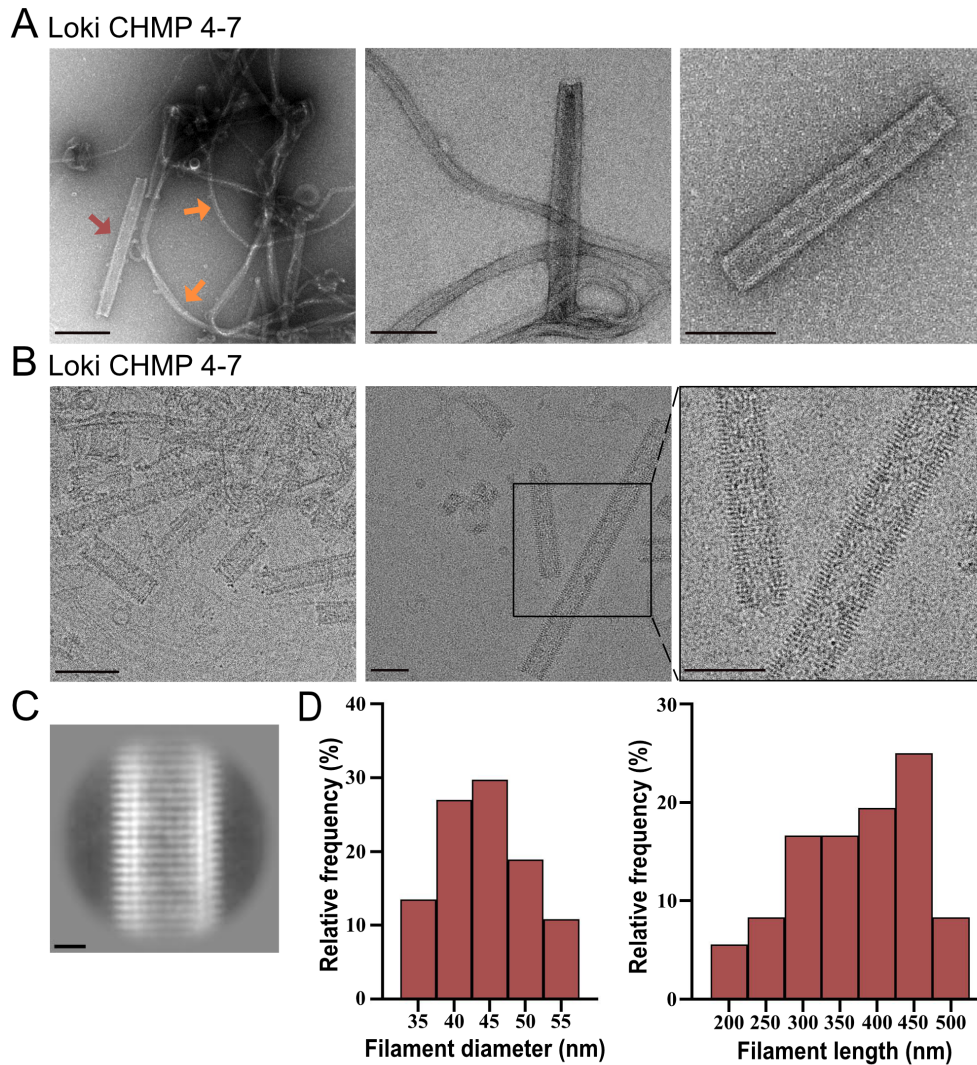

546

547 **Fig 1. Loki CHMP4-7 protein self-assemble into filaments and helical tubes.**

548 **A.** Negative-stain TEM micrographs of Loki CHMP4-7 homo-filaments. Representative  
549 zoomed-out (left, scale = 200 nm) and zoomed-in (middle and right, scale = 100 nm)  
550 images are shown. Orange arrows indicate filaments, red arrow indicates a helical tube.

551 **B.** Representative Cryo-EM micrographs of Loki CHMP4-7 homo-polymers. Left,  
552 zoomed-out image (Scale = 100 nm), middle and right, zoomed-in images (Scale = 50  
553 nm). Box in middle panel specify the zoomed-in region shown to the right. **C. A**

554 representative 2D class average of 502 particles extracted from CHMP 4-7 projections.

555 Scale = 100 Å. **D.** Measurements of Loki CHMP4-7 helical diameters (left, n = 37) and

556 length (right, n = 36) obtained from negative stain TEM images acquired from two  
557 independent experiments. Averaged CHMP 4-7 helical tube diameter  $44\text{nm}\pm 30.9$ .

558

559

560

561

562

563

564

565

566

567

568

569

570

571

572

573

574

575

576

577

578

579

580

581

582

583

584

585

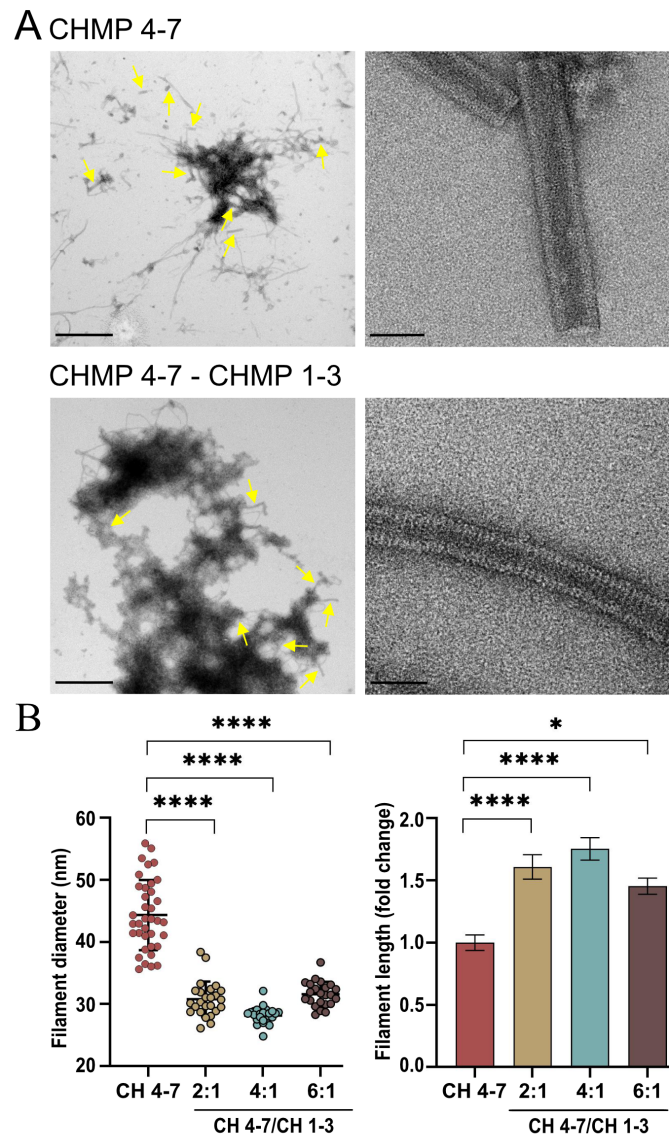

586

587 **Fig 2. Loki CHMP4-7 and CHMP1-3 co-polymers assemble into helical tubes**  
588 **exhibiting different properties from CHMP 4-7 homo-polymers.**

589 **A.** Representative Negative- stain TEM images of Loki CHMP4-7 homo-polymers  
590 (upper panels) and CHMP4-7-CHMP1-3 co-polymers (bottom panels, 2:1 molar ratio).  
591 Zoomed- out (left, scale = 1  $\mu$ m) and zoomed- in (right, scale = 50 nm) images are  
592 shown. Yellow asterisks indicate helical tubes. **B.** Measurements of CHMP4-7-CHMP1-  
593 3 hetero-filaments diameters (left) and length (right) at the indicated molar ratios  
594 obtained from negative stain TEM images. Averaged diameters (nm): 2:1 ratio, 31 $\pm$ 7.7;  
595 4:1 ratio 28 $\pm$ 1.6, 6:1 ratio 32 $\pm$ 3.8. n = 25 for each condition.

### A CHMP 4-7 - CHMP 1-3

No DNA

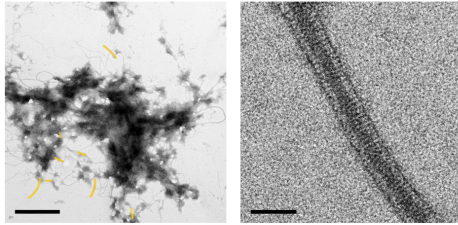

dsDNA

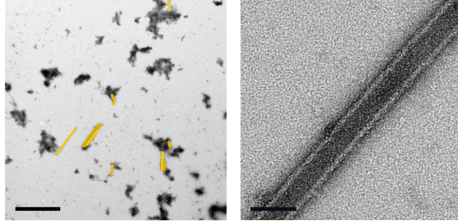

ssDNA

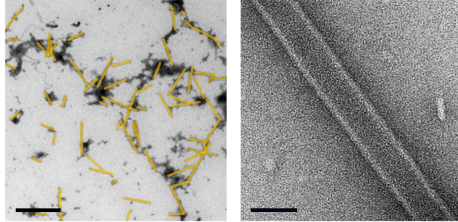

### B CHMP 4-7 - CHMP 1-3 ssDNA

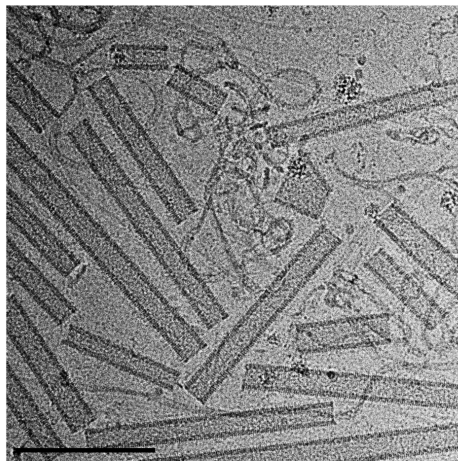

### F CHMP 4-7 - CHMP 1-3

No DNase I

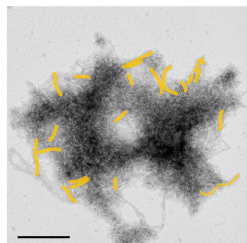

DNase I

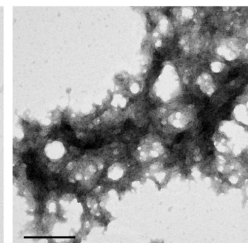

DNase I (post assembly)

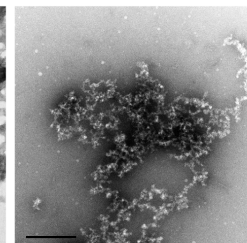

### C CHMP 4-7

No DNA

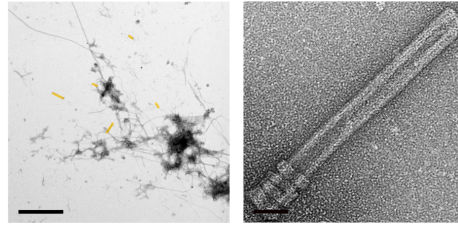

ssDNA

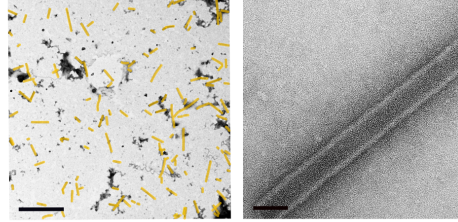

### D

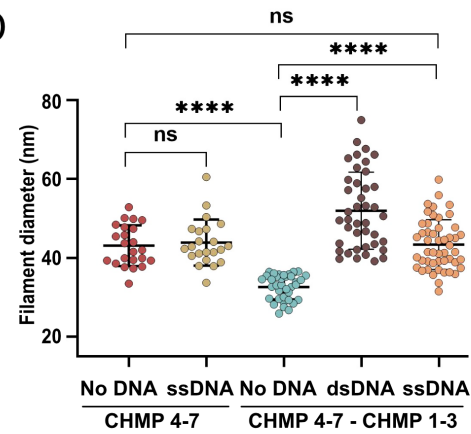

### E

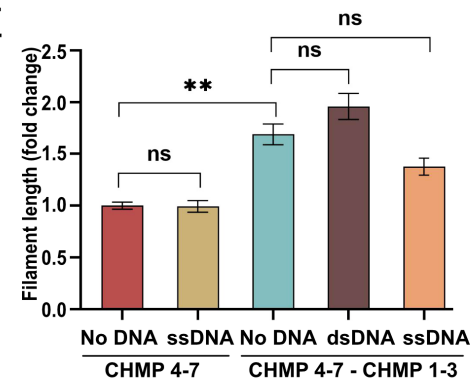

597 **Fig 3. Organization into helical tubes is increased in the presence of DNA**

598 **A.** Negative- stain TEM micrographs of CHMP 4-7-CHMP 1-3 co- polymers (2:1 molar  
599 ratio) in the presence of 4.6  $\mu\text{M}$  40 bases oligonucleotides (ssDNA or dsDNA, as  
600 indicated). Representative zoomed- out (left, Scale = 1  $\mu\text{m}$ ) and zoomed- in (right, Scale  
601 = 50 nm) images are shown. Helical tubes are colored in yellow in zoomed out images  
602 to highlight the observed increase in tubes (raw images are provided in Sup Fig 2A). **B.**  
603 Representative Cryo-EM images of CHMP 4-7- CHMP 1-3 co-polymers (molar ratio,  
604 4:1) in the presence of ssDNA. Scale = 200 nm. **C.** Negative- stain TEM micrographs of  
605 CHMP 4-7 homo-polymers in the presence of 4.6  $\mu\text{M}$  40 bases ssDNA. Representative  
606 zoomed- out (left, Scale = 1  $\mu\text{m}$ ) and zoomed- in (right, Scale = 50 nm) images are  
607 shown. Helical tubes are colored in yellow in zoomed out images to highlight the  
608 observed increase in tubes (raw images are provided in Sup Fig 2B). **D-E** Diameter (**D**)  
609 and length (**E**) measurements of helical tubes formed by homo- and the co-polymers  
610 (2:1 ratio) in the presence of nucleic acids obtained from negative stain TEM images.  
611 Averaged diameters (nm): CHMP4-7 ssDNA  $43.9 \pm 33$ ,  $n=21$ ; CHMP4-7-CHMP1-3 2:1  
612 dsDNA  $51.9 \pm 94$ ,  $n=44$ ; CHMP4-7-CHMP1-3 2:1 ssDNA  $43.9 \pm 58$ ,  $n=48$ ). **F.**  
613 Representative Negative- stain TEM images of co-polymers (molar ratio 2:1) upon  
614 addition of 20 mg/ml DNase I during (middle panel) or after (right panel) polymerization.  
615 Helical tubes are colored in yellow. Scale =200 nm. Data was reproduced in four  
616 independent experiments.

617

618

619

620

621

622

623

624

625

626

627

**A** CHMP 4-7 - CHMP 1-3 ssDNA + SUVs

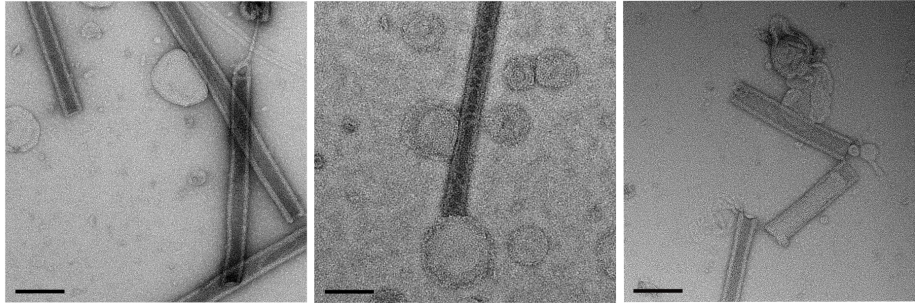

**B** CHMP 4-7 - CHMP 1-3 + SUVs

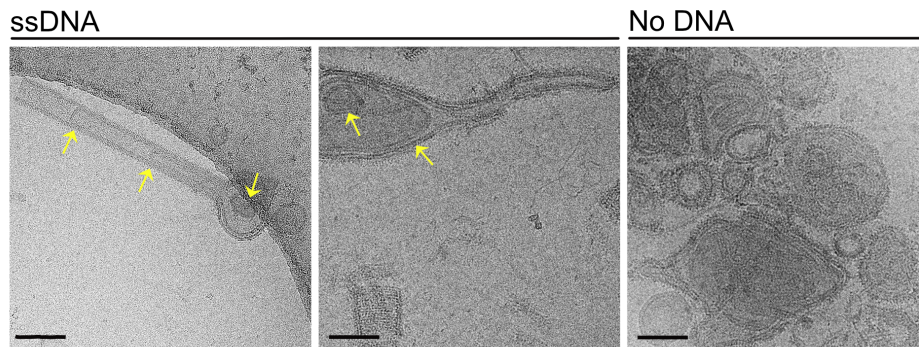

**C**

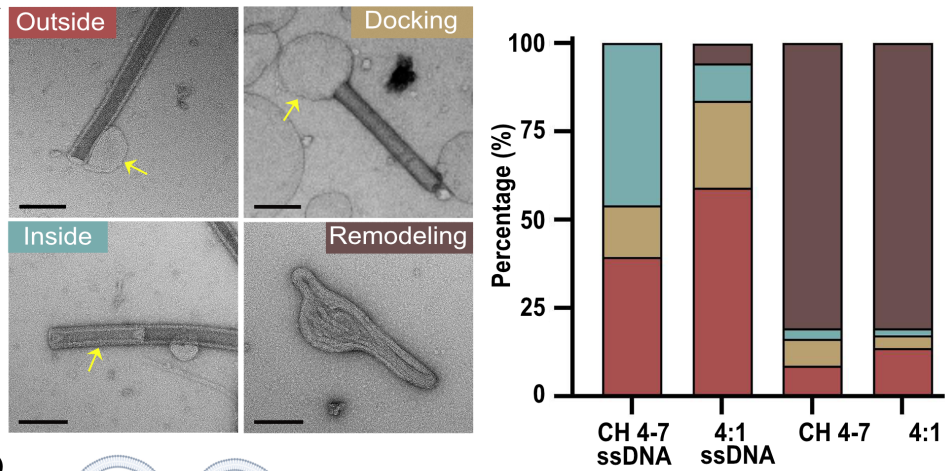

**D**

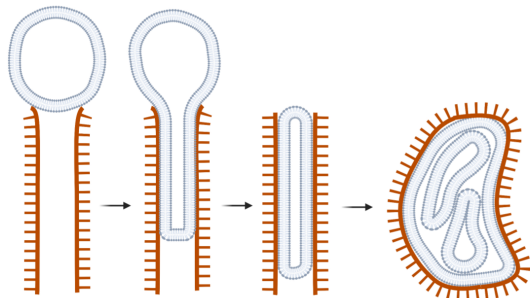

629 **Fig 4. Loki ESCRT-III filaments induce membrane remodeling**

630 **A-B.** Representative Negative-stain TEM (**A**) and Cryo-EM images (**B**) of CHMP4-7-  
631 CHMP1-3 (molar ratio, 4:1) polymerized in the presence of ssDNA (10  $\mu$ M) and  
632 incubated with SUVs (DOPC:DOPS, 1:1 ratio). Scale = 100 nm. Arrows in **B** specify  
633 internalized vesicles. Reconstructed tomograms of filaments collected from the same  
634 grid are provided in Sup. movies 1 and 2. **C.** Percentages of the different types of  
635 vesicle-tube interactions observed under the specified conditions. Left panel,  
636 represented negative-stain images of the four types of interactions quantified. Outside,  
637 attachment of SUV to the outside of the helical tube (type 1); Docking, binding of the  
638 vesicle to the tip of the helical tube (type 2); Inside, invagination of the SUV to the  
639 helical tube (type 3); Remodeling, deformation of both the vesicles and the ESCRT-III  
640 helical tube (type 4). Data was quantified from negative stain images obtained in 3  
641 independent experiments (n = CHMP4-7 ssDNA, 124; CHMP4-7-CHMP1-3 ssDNA,  
642 159; CHMP4-7, 197; CHMP4-7-CHMP1-3, 161). Scale = 100 nm. Chi square statistical  
643 analysis shows a significant difference in the distributions of CHMP4-7 ssDNA vs  
644 CHMP4-7 (\*\*\*\*p-value  $\leq 0.0001$ ), CHMP4-7-CHMP1-3 ssDNA vs CHMP4-7-CHMP1-3  
645 (\*\*\*\*p-value  $\leq 0.0001$ ), and CHMP4-7 ssDNA vs CHMP4-7-CHMP1-3 ssDNA (\*\*\*\*p-  
646 value  $\leq 0.0001$ ). No significance was found in the distributions of CHMP4-7 vs CHMP4-  
647 7-CHMP1-3. **D.** A suggested model for Loki ESCRT-III mediated vesicle remodeling.  
648 Vesicles dock at the tip of the ESCRT-III tube. Docking allows the vesicle to directly  
649 interact with the interior of the tube, leading to deformation and invagination of the  
650 vesicle by the ESCRT-III filament. This process occurs repeatedly leading to the  
651 formation of a complex membrane network inside the helical tube, which pushes the  
652 ESCRT-III tube from the inside and ultimately causing deformation and remodeling of  
653 the tube. This stage is inhibited in the presence of DNA, resulting in the accumulation of  
654 ESCRT-III-SUV interactions in all the stages that preceded this complete remodeling  
655 stage.

656

657

658

659
